# Supplementary material for: A composite dielectric membrane with low dielectric loss for dendrite-free lithium deposition in lithium metal batteries
Source: Royal Society of Chemistry journal article supplement (doi:10.1039/d4ta06318j), 2024-01-01
Supplement: d4ta06318j1.pdf [file d4ta06318j1.pdf]

## Supporting information

### A composite dielectric membrane with low dielectric loss for dendrite-free lithium deposition in lithium metal batteries

*Zetao Ren,<sup>#a</sup> Sichen Gu,<sup>#\*b</sup> Tong Li,<sup>a</sup> Linkai Peng,<sup>a</sup> Changhong Zou,<sup>a</sup>  
Feiyu Kang<sup>\*a</sup> and Wei Lv<sup>\*a</sup>*

Z. Ren, T. Li, L. Peng, F. Kang, W. Lv

Shenzhen Geim Graphene Center, Shenzhen Key Laboratory for Graphene-based Materials, Tsinghua Shenzhen International Graduate School, Tsinghua University, Shenzhen, 518055, China

E-mail: [lv.wei@sz.tsinghua.edu.cn](mailto:lv.wei@sz.tsinghua.edu.cn); [fykang@sz.tsinghua.edu.cn](mailto:fykang@sz.tsinghua.edu.cn)

S. Gu

Laboratory for Advanced Materials and Batteries, Department of Material Science, Shenzhen MSU-BIT University, Shenzhen, 518172, China

E-mail: [sichen.gu@smbu.edu.cn](mailto:sichen.gu@smbu.edu.cn)

**Keywords:** Lithium Metal batteries, Dielectric Constant, Dielectric loss, Porous Structure.

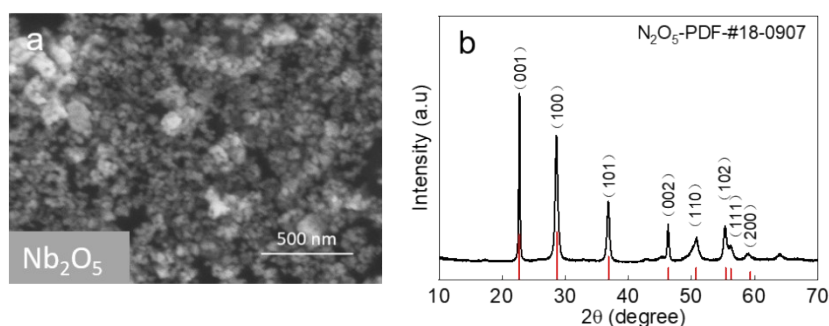

**Figure S1.** a) SEM morphology of  $\text{Nb}_2\text{O}_5$ , and b) XRD pattern of  $\text{Nb}_2\text{O}_5$ .

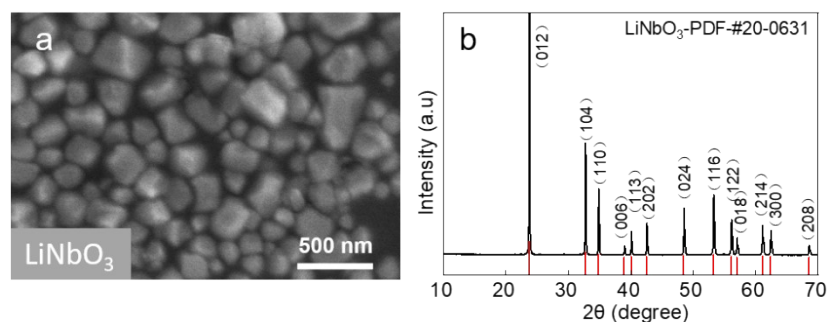

**Figure S2.** a) SEM morphology of  $\text{LiNbO}_3$ , and b) XRD pattern of  $\text{LiNbO}_3$ .

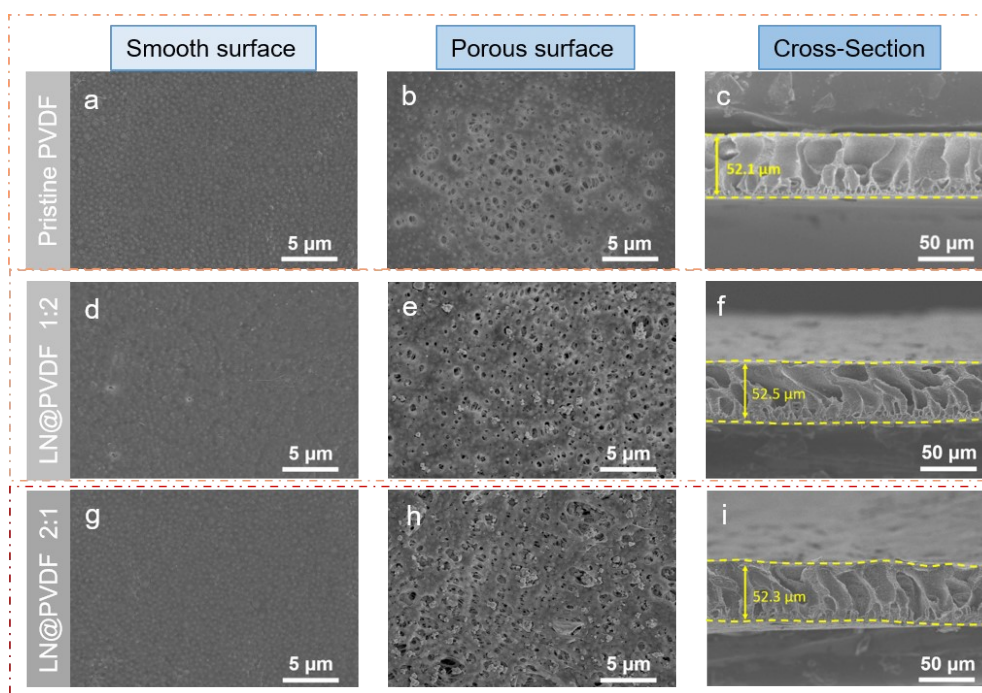

**Figure S3.** The smooth surface, porous surface and cross-sectional SEM morphologies of the (a-c) porous PVDF, (d-f) LN@PVDF 1:2, and (g-i) LN@PVDF 2:1.

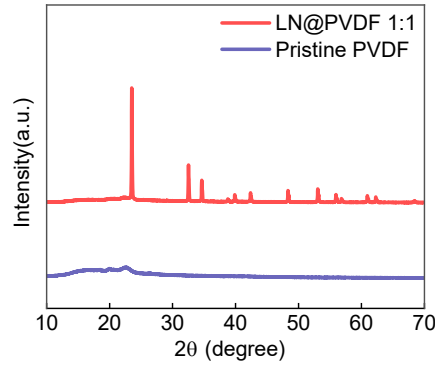

**Figure S4.** XRD patterns of pristine PVDF and LN@PVDF 1:1.

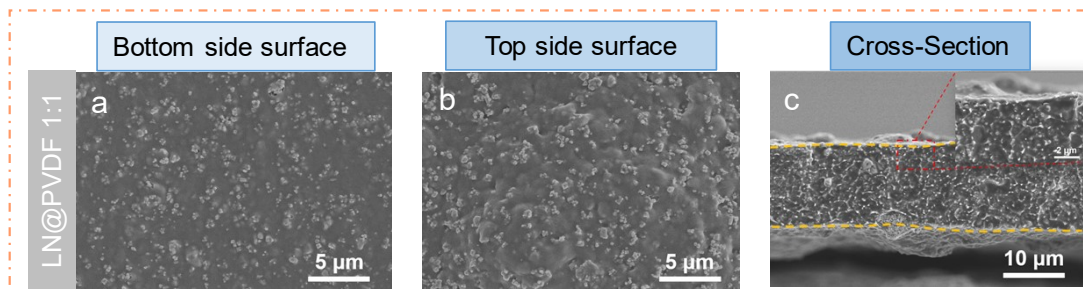

**Figure S5.** SEM images of the LN@PVDF-np 1:1.

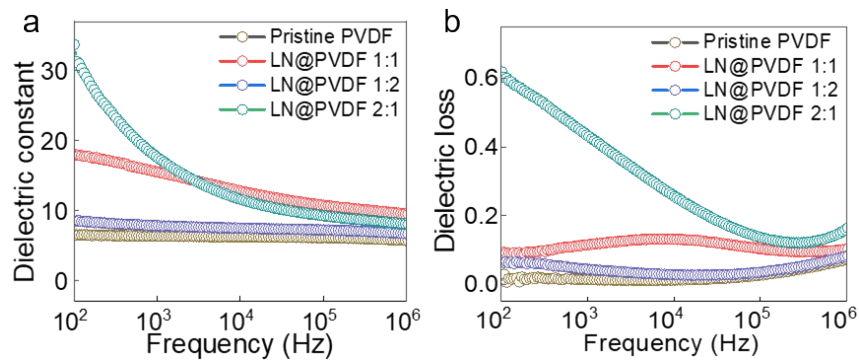

**Figure S6.** a) Dielectric constant, and b) dielectric loss of the pristine PVDF, LN@PVDF 1:1, LN@PVDF 1:2, and LN@PVDF 2:1.

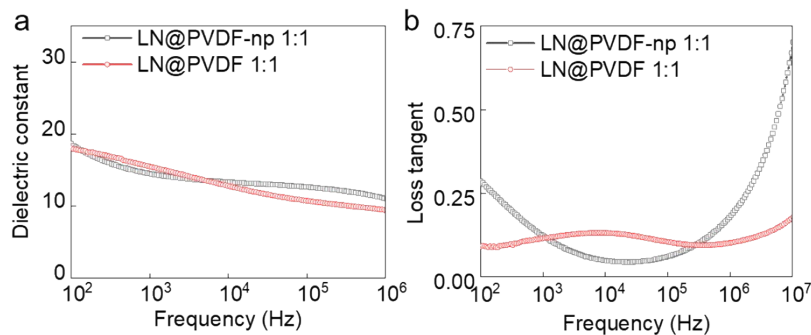

**Figure S7.** a) The Dielectric constant diagram, and b) dielectric loss of the LN@PVDF 1:1 and LN@PVDF-np 1:1 film.

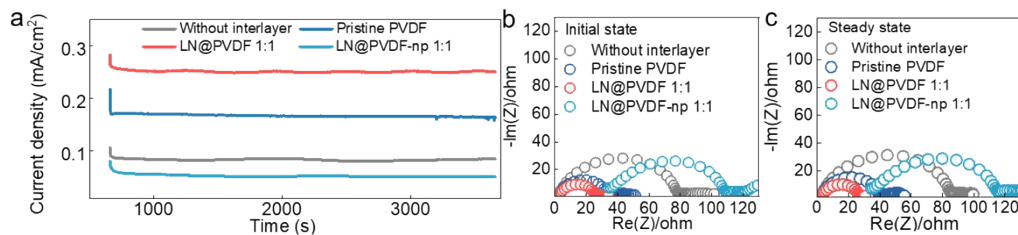

**Figure S8.** The Li-ion transference number ( $t_{Li^+}$ ) measurement using the Li-Cu cells with PVDF, LN@PVDF 1:1, LN@PVDF-np 1:1 and without interlayer. a) Steady-state current measurement, b,c) impedance spectra for the initial state and steady-state.

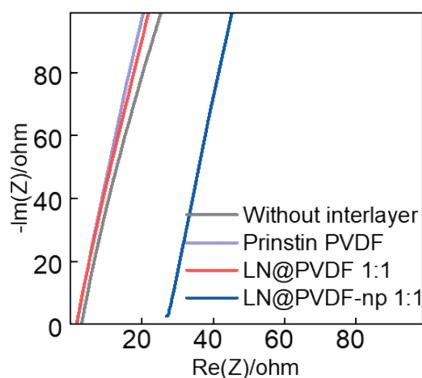

**Figure S9.** The ion conductivity measurement for different samples.

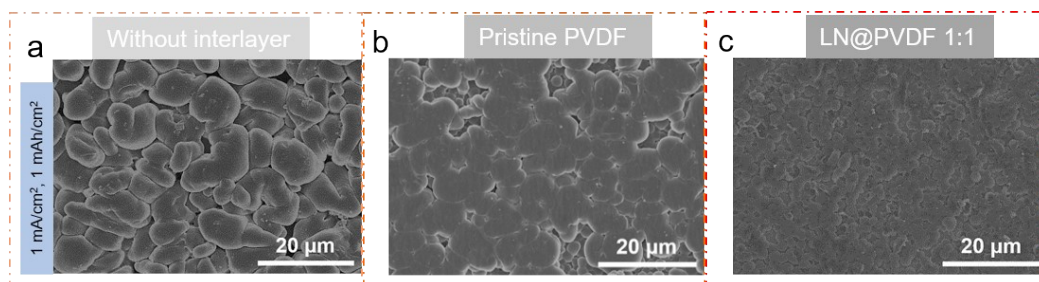

**Figure S10.** SEM images after Li deposition for  $1 \text{ mAh cm}^{-2}$  a) without interlayer, b) with pristine PVDF, and c) with LN@PVDF 1:1 respectively.

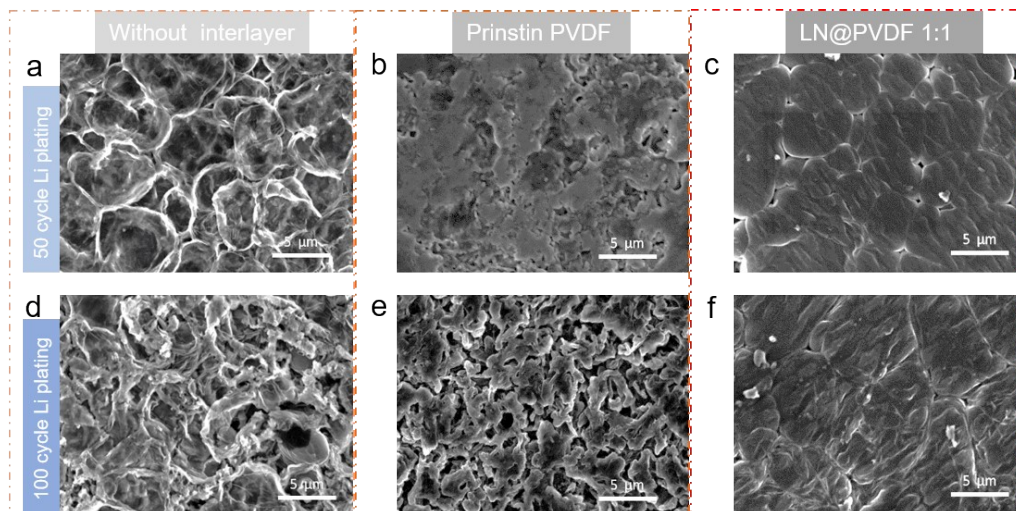

**Figure S11.** a-c) SEM images of the deposited Li on the Cu after the 50th plating without interlayer, with the interlayer of PVDF film, and LN@PVDF 1:1. d-e) SEM images of the deposited Li on the Cu after the 100th plating without interlayer, with the interlayer of PVDF film, and LN@PVDF 1:1.

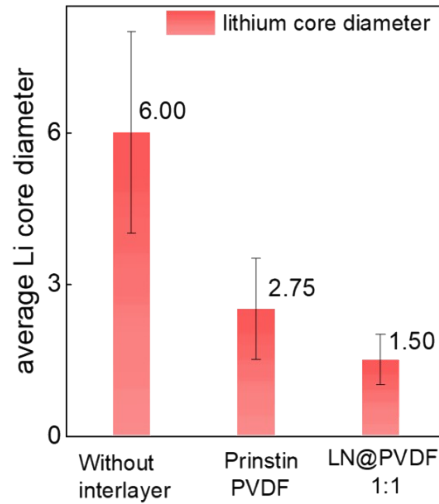

**Figure S12.** Statistical measurement for the lithium nuclei diameter under the current density of  $1 \text{ mA cm}^{-2}$  and the capacity of  $0.5 \text{ mAh cm}^{-2}$

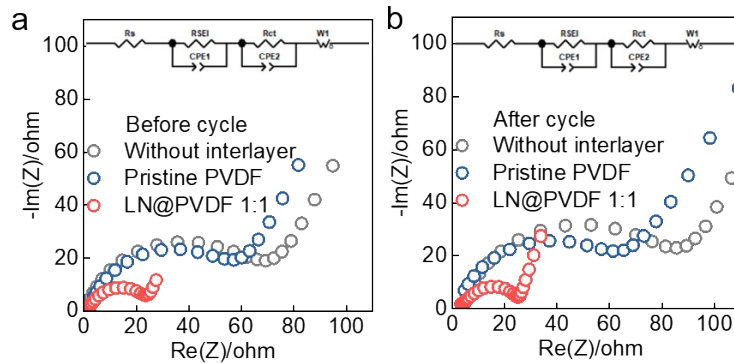

**Figure S13.** AC impedance spectra of Li-Cu half-cell with PVDF, LN@PVDF 1:1 and without interlayer before and after the 50 times plating and stripping. a) The impedances of the half-cells before cycling with PVDF, LN@PVDF 1:1 and without interlayer are 58, 23, and 67  $\Omega$  respectively; b) The impedances of the half-cells after cycling with PVDF, LN@PVDF 1:1 and without interlayer are 61, 24, and 82  $\Omega$ , respectively.

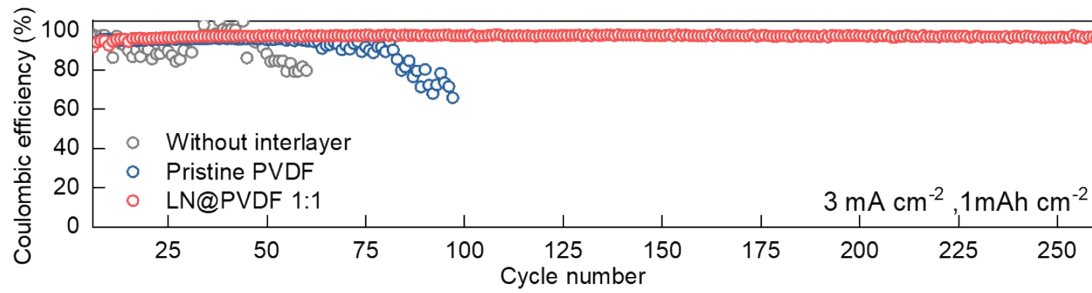

**Figure S14.** CE of the Li-Cu with the PVDF interlayer, LN@PVDF 1:1 interlayer and without interlayer, under the current density and capacity of  $3 \text{ mA cm}^{-2}$ ,  $1 \text{ mAh cm}^{-2}$ .

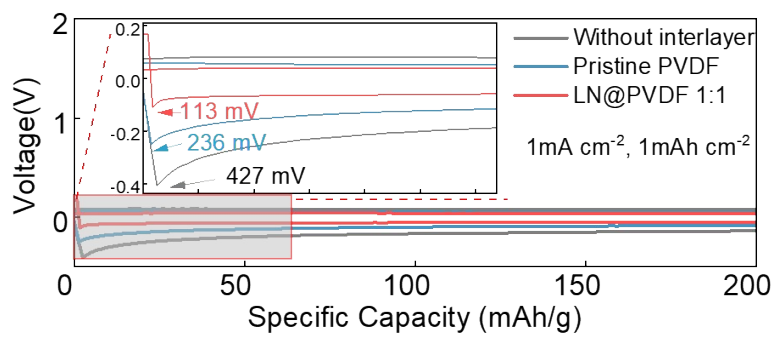

**Figure S15.** The nucleation overpotentials under the current densities of  $1 \text{ mA cm}^{-2}$ .

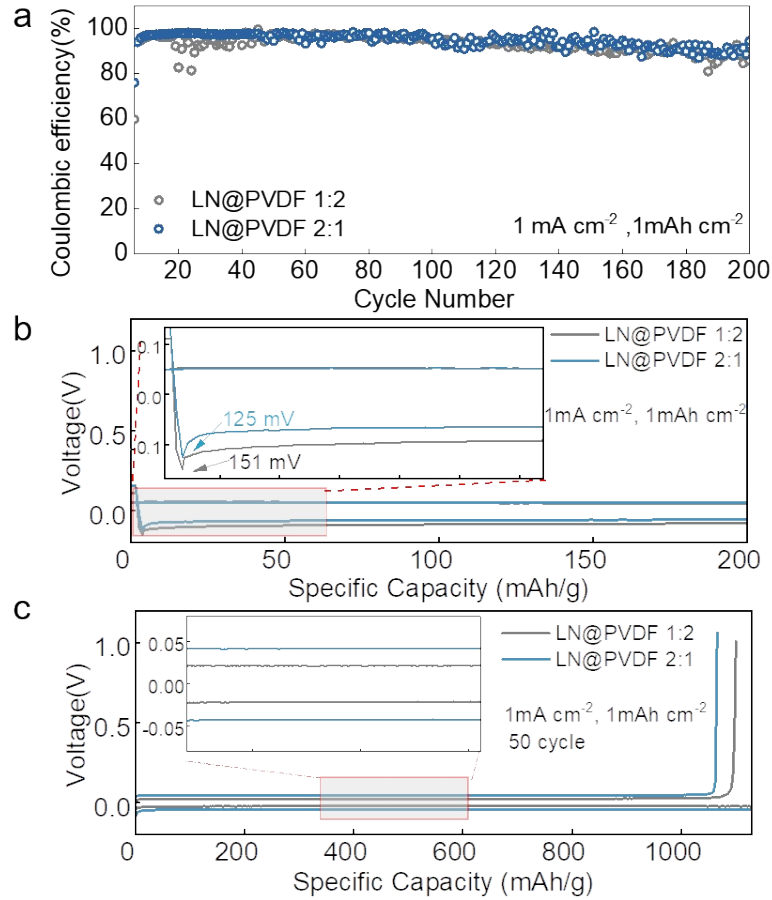

**Figure S16.** a) CE of Cu-Li cell with LN@PVDF 1:2 and LN@PVDF 2:1, b) The nucleation overpotentials of the first cycle under the current densities of  $1 \text{ mA cm}^{-2}$ , c) the 50th plating and stripping curves under the current density of  $1 \text{ mA cm}^{-2}$ .

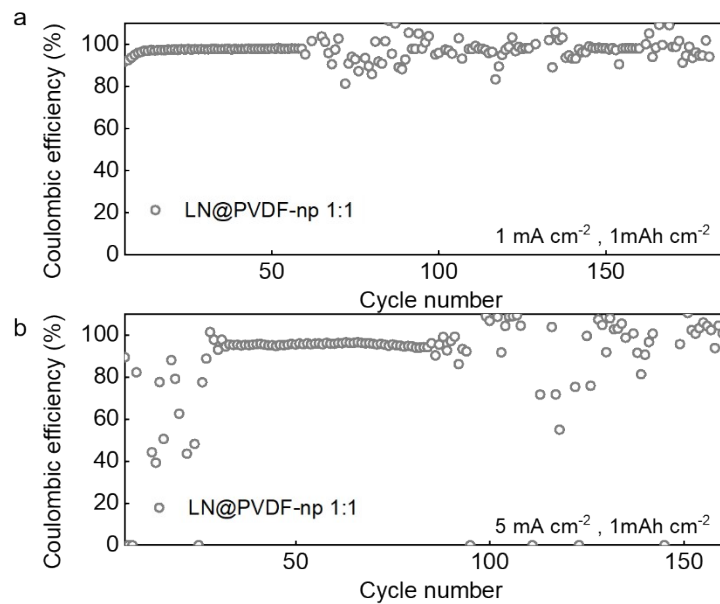

**Figure S17.** CE of Li-Cu half-cell with LN@PVDF-np 1:1 ( $1 \text{ mA cm}^{-2}$ ,  $1 \text{ mAh cm}^{-2}$ ;  $5 \text{ mA cm}^{-2}$ ,  $1 \text{ mAh cm}^{-2}$ ).

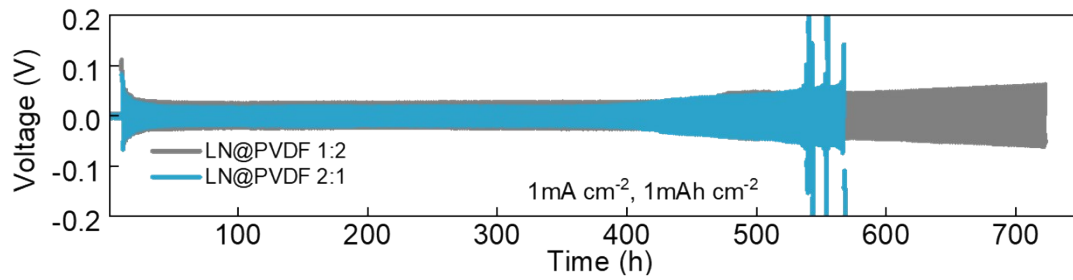

**Figure S18.** The time-voltage curves of Li-Li symmetric cells with LN@PVDF 1:2 and LN@PVDF 2:1.

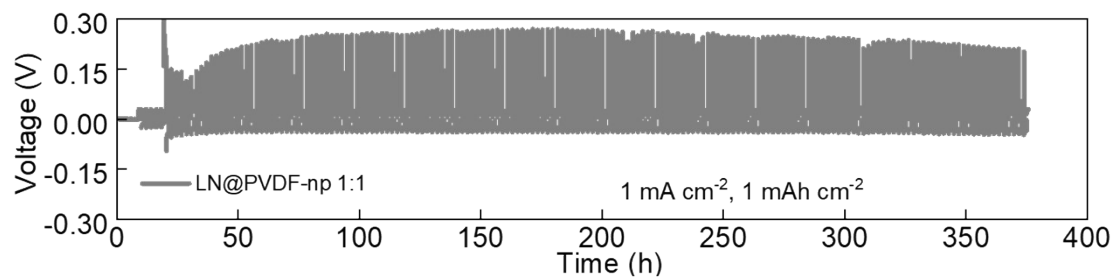

**Figure S19.** The time-voltage curve of the Li-Li symmetric cell with the LN@PVDF-np 1:1.



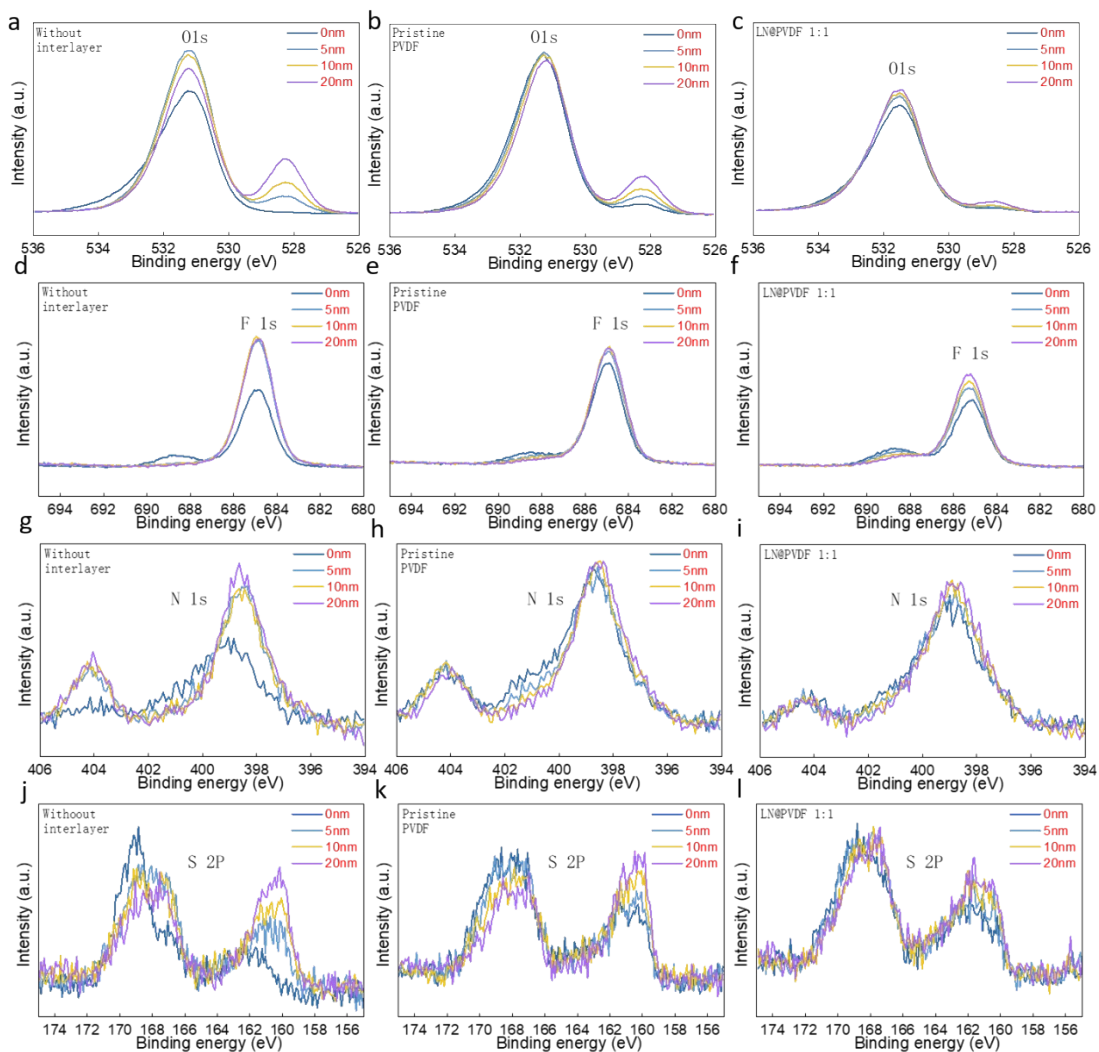

**Figure S20.** O  $1s$ , F  $1s$ , N  $1s$  and S  $2p$  spectra of the SEI on lithium electrodes at different depths.

Table S1. The fitted  $R_{SEI}$  and  $R_{ct}$  values of cells in Figure 4e

| Before cycle       | $R_{SEI}$ | $R_{ct}$ |
|--------------------|-----------|----------|
| Without interlayer | 55        | 17.3     |
| Pristine PVDF      | 46.8      | 15.4     |
| LN@PVDF 1:1        | 26.5      | 13       |

Table S2. The fitted  $R_{SEI}$  and  $R_{ct}$  values of cells in Figure 4f

| After cycle        | $R_{SEI}$ | $R_{ct}$ |
|--------------------|-----------|----------|
| Without interlayer | 63.9      | 13       |

|                      |      |     |
|----------------------|------|-----|
| <b>Pristine PVDF</b> | 51.7 | 12  |
| <b>LN@PVDF 1:1</b>   | 27.3 | 9.3 |

Table S3. The fitted  $R_{SEI}$  and  $R_{ct}$  values of cells in Figure 4g

| <b>After cycle</b> | <b><math>R_{SEI}</math></b> | <b><math>R_{ct}</math></b> |
|--------------------|-----------------------------|----------------------------|
| <b>LN@PVDF 1:2</b> | 40.3                        | 14.3                       |
| <b>LN@PVDF 2:1</b> | 32.6                        | 12.3                       |
| <b>LN@PVDF 1:1</b> | 29.1                        | 10.8                       |

Table S4. The fitted  $R_{SEI}$  and  $R_{ct}$  values of cells in Figure 5f

| <b>After cycle</b>        | <b><math>R_{SEI}</math></b> | <b><math>R_{ct}</math></b> |
|---------------------------|-----------------------------|----------------------------|
| <b>Without interlayer</b> | 93.36                       | 982                        |
| <b>Pristine PVDF</b>      | 63.3                        | 633                        |
| <b>LN@PVDF 1:1</b>        | 51.5                        | 313                        |
